# Supplementary material
Source: publisher site journal article supplement (https://www.dovepress.com/article/591142)
Supplement: Supplementary file 1 [file 591142%20Revised%20Supplementary%20Materials.docx]

**Supplementary File 1: Questionnaire**

*Quantitative Questionnaire in Thai*

1. ท่านนิยามตัวเองเป็นเพศอะไร
   1. ชาย
   2. หญิง
   3. ไม่ต้องการระบุ
2. ท่านมีเกรดเฉลี่ยเท่าไหร่
3. จำนวนหัวข้องานวิจัยที่ท่านเป็นคนริเริ่มคิดไอเดียขึ้นมาเอง หรือ มีส่วนร่วมในการริเริ่ม
4. งานวิจัยชิ้นที่ # ของท่าน เป็นงานวิจัยประเภทใด
   1. Basic Science Research
   2. Clinical Research
   3. Systematic Review/Meta-analysis
   4. Medical Education Research
   5. Health Policy/System Research
5. ท่านทำงานวิจัยนี้ไปถึงขั้นไหนแล้ว
   1. มีไอเดียและเริ่มทำ literature review แต่ยังไม่เจอที่ปรึกษาวิจัย
   2. ได้ที่ปรึกษาวิจัยและเริ่มทำ literature review แล้ว
   3. เริ่มเขียน proposal หรือ concept paper แล้ว
   4. ส่ง proposal ไปแล้ว
   5. อยู่ในระหว่างการทำงานวิจัย
   6. ทำงานวิจัยเสร็จแล้วและกำลังเขียนสรุปผล
   7. งานวิจัยได้ถูกตีพิมพ์เรียบร้อยแล้ว
6. ท่านคิดไอเดีย หรือ ได้แรงบันดาลใจในการคิดหัวข้องานวิจัยของท่านมาจากที่ใดบ้าง
   1. จากการเรียนในห้อง
   2. จากการอ่านงานวิจัยอื่นด้วยตัวเอง
   3. จากการสนทนากับอาจารย์ในคณะ
   4. จากการสนทนากับรุ่นพี่
   5. จากการสนทนากับเพื่อน ๆ ในรุ่น
   6. จากการสนทนากับรุ่นน้อง
   7. จากการเข้าสัมมนาวิจัย (เช่น Research Camp, Research Market, Research Tour)
7. หากท่านมีปัจจัยอื่น ๆ ที่ช่วยให้ท่านคิดงานวิจัยของท่านขึ้นมาได้ โปรดระบุในช่องทางด้านล่างพร้อมกับระบุความสำคัญ (ไม่สำคัญไปจนถึงสำคัญมากที่สุด)
8. ในความคิดเห็นของท่าน ปัจจัยใดเป็นปัจจัยที่สำคัญที่สุดในการช่วยทำให้ได้อาจารย์ปรึกษาวิจัยท่านปัจจุบันของงานวิจัยนี้มาร่วมทำงานกับท่าน
   1. จากการที่อาจารย์เป็นผู้สอนในห้อง
   2. ได้เข้าสัมมนาวิจัย (เช่น Research Camp, Research Market, Research Tour)
   3. ค้นหาชื่อในช่องทางออนไลแล้วส่งอีเมลล์ให้อาจารย์
   4. ได้แนะนำมาจากอาจารย์ท่านอื่น
   5. ได้แนะนำมาจากรุ่นพี่
   6. ได้แนะนำมาจากเพื่อนๆในรุ่น
   7. ได้แนะนำมาจากรุ่นน้อง

*Quantitative Questionnaire in English*

1. What is your gender identity? (Select one option)
   1. Male
   2. Female
   3. Prefer not to say
2. What is your current GPA? (Short answer)
3. How many research projects have you initiated?

Please include projects where you were the originator of the idea, either independently or through brainstorming with others. Projects in the literature review stage can be included. (Select one option)

1. What type of research was your Research #? (Select one option)
   1. Basic Science Research
   2. Clinical Research
   3. Systematic Review/Meta-analysis
   4. Medical Education Research
   5. Health Policy/System Research
2. What is the current status of Research #? Please select the earliest stage that applies. (Select one option)
   1. Idea generation and literature review started, but no advisor found yet
   2. Advisor identified, and literature review in progress
   3. Concept paper or proposal drafted
   4. Proposal submitted
   5. Lab work or study has begun
   6. Lab work or study completed
   7. Paper accepted and published in an academic journal
3. What inspired the idea for your Research #?

Rate each option from least to most important:

- 1. Inspired by a class lecture
  2. Self-directed literature review
  3. Discussion with a faculty member specializing in the field
  4. Discussion with senior students
  5. Discussion with peers
  6. Discussion with junior students
  7. Attendance at institution-hosted research events (e.g., Research Market, Research Camp, Research Tour)

1. Were there any other events or sources of inspiration for your Research # that are not listed above?

If so, please describe them and explain their significance. (Short answer)

1. What played the most significant role in connecting you with your advisor for Research #? What event or interaction led to your advisor and you deciding to collaborate? (Select one option)
   1. Meeting the professor during class lectures
   2. Attendance at institution-hosted research events (e.g., Research Market, Research Camp, Research Tour)
   3. Searching online and contacting advisors via email or direct messages
   4. Recommendation by another professor
   5. Recommendation by senior students
   6. Recommendation by peers
   7. Recommendation by junior students

*Qualitative Interview Questions in Thai*

1. อะไรเป็นสิ่งที่จุดประกายหรือแรงบันดาลใจให้ท่านได้สนใจและได้ริเริ่ม งานวิจัยชิ้นที่ (#) ของท่าน โปรดอธิบาย
2. ท่านคิดว่าอะไรเป็นจุดแข็งหรือจุดอ่อนของทางคณะในการสนับสนุนโครงงานวิจัยของนักศึกษาแพทย์ และคณะควรมีจุดแก้ไขอะไรบ้างเพื่อที่จะช่วยให้ท่านหรือรุ่นน้องต่อๆไปหาแรงบันดาลใจในการเริ่มงานวิจัยใหม่ได้สะดวกมากขึ้น
3. ท่านได้ไปพบและได้อาจารย์ที่ปรึกษาโครงงานวิจัยชิ้น (#) มาได้อย่างไร โปรดอธิบาย
4. คณะควรมีจุดสนับสนุนหรือจุดแก้ไขอะไรบ้างเพื่อที่จะช่วยให้ท่านหรือรุ่นน้องต่อๆไปหาที่ปรึกษาโครงการเพื่อเริ่มงานวิจัยใหม่ได้สะดวกมากขึ้น
5. โปรดอธิบายลักษณะในอุดมคติที่ท่านต้องการเห็นในอาจารย์ที่ปรึกษาโดยละเอียด
6. คุณคิดอย่างไรกับการที่หลักสูตรมีการบังคับให้นักศึกษาทำวิจัย

*Qualitative Interview Questions in English*

1. What motivated you to start or become interested in your project(s)? Please explain.
2. What are your opinions on the strengths and weaknesses of the Faculty of Medicine, Ramathibodi Hospital, in supporting research? Are there specific areas where improvements could help future medical students find their passion and inspiration for research?
3. How were you matched with your advisor for your project(s)? Please elaborate.
4. What should the Faculty of Medicine, Ramathibodi Hospital, improve to help students find and connect with suitable professors?
5. How would you describe an ideal research advisor?
6. Do you agree with the current requirement for all medical students at the Faculty of Medicine, Ramathibodi Hospital, to participate in research?
7. If research were not mandatory, would you still choose to engage in it?

**Supplementary File 2: Qualitative Themes and Summaries**

1. Generation of Research Ideas

Summary of qualitative themes on medical students’ motivations and processes/inspirations for initiating and generating ideas for research projects.

| **Theme** | **Summary** |
| --- | --- |
| Personal motivations behind initiating each research | - Research being a mandatory component of the curriculum - A desire to explore and answer questions sparked by classroom discussions or personal experiences - Encouragement or invitations from peers or professors to join research projects - Viewing research as a valuable step to support future career goals in medicine - An interest in exploring potential research opportunities within a personally preferred field or specialty - A strong intrinsic motivation, with some interviewees expressing a desire to pursue research simply for the sake of doing it |
| Idea generation and initiation of projects | - The project idea did not originate from the interviewee but was suggested by external sources such as professors, mentors, or friends. - Some interviewees had a specific interest, such as a disease or medical specialty, and sought further inspiration by browsing the Tonkla Ramathibodi website or consulting with professors. - The idea emerged as a question sparked by classroom lectures or academic exposure. - Research seminars organized by the institution provided a platform to explore potential project ideas. - Ideas were also developed through external events, such as hackathons or other activities not specifically designed for student research exploration. - Participants adapted concepts from extracurricular activities they were already involved in and transformed them into research projects. |

1. Advisor matching

Summary of qualitative themes on advisor matching and characteristics of effective research mentors.

| **Theme** | **Summary** |
| --- | --- |
| Matching with advisors | - The participant consulted the professor overseeing the research subject to identify a suitable advisor. - The project advisor was a faculty lecturer. - Recommendations were received from other professors. - A friend provided a recommendation for the advisor. - The mentor professor assigned by the institution became the research advisor. - The professor's contact email was found through the Tonkla Ramathibodi website. - Initial contact was made with the professor during institution-hosted research seminars. - An email was sent to Tonkla Ramathibodi's general contact, and the employee responded with a professor recommendation. - The participant was invited to collaborate again by their previous research project advisor. |
| Qualities of an ideal advisor | - Expertise in the Field: An ideal advisor should possess deep expertise in the field they are advising, ensuring they can provide valuable insights and guidance. - Supportive Environment: They should promote a casual and friendly yet professional environment, making students feel comfortable asking questions without fear of judgment, pressure, or stress. - Inspiration and Leadership: An ideal advisor should be passionate about their work, inspiring students while providing guidance and teaching. They should strike a balance between support and independence by offering help without taking over the project. Effective delegation of tasks is crucial. - Resourceful Guidance: Advisors should provide students with resources and additional materials to help them deepen their understanding of the research topic, rather than simply directing them to “look it up online.” - Clear and Effective Communication: An ideal advisor should communicate clearly and promptly, especially regarding project expectations and responsibilities. Utilizing fast communication channels, like messaging apps, can greatly enhance the advising experience. - Self-Awareness and Time Management: Advisors should recognize their own limitations, such as their response time and workload capacity. It’s a bonus if they can personally oversee the student’s progress. - Empathy and Understanding: They should empathize with students, acknowledging that they are learners balancing academic studies, and not treating them as full-fledged research assistants. - Selective Engagement: An ideal advisor should be upfront about rejecting topics they are not interested in, saving both their time and the student’s. - Curriculum Awareness: Advisors should understand the timeline of the research curriculum, helping students stay on track and develop strong time management skills. - Open-Mindedness: An ideal advisor should be open to new ideas and concepts, encouraging innovative thinking and creativity. - Constructive Feedback: Advisors should provide honest, constructive feedback, especially when students make mistakes, supporting growth while maintaining a positive atmosphere. - Personalized Support: Recognizing that each student has unique ambitions, an ideal advisor should help scope research topics to align with the student’s goals and aspirations. |
| Evaluating the effectiveness of advisor matching in the curriculum and identifying areas for improvement | - Institution-hosted research seminars were highly appreciated by most of the interviewed students, with a preference for onsite seminars over online ones. - The contact information provided on the Tonkla Ramathibodi website was also well-received, but it should be regularly updated to ensure accuracy and reflect the actual contact details used by advisors. - Beyond just contact details, the Tonkla Ramathibodi website could also include information about each professor's capacity and availability for new students. - Extending the timeline for professor matching in the research curriculum would be beneficial. The current requirement for students to have a registered advisor by their second year is perceived as too rushed. - Organizing workshops to teach students how to write formal emails to professors would be highly valuable. - Increasing visibility and opportunities to connect with clinical advisors is strongly encouraged. - New medical students should be encouraged to observe their senior peers working on research projects, providing them with early exposure and inspiration. |

1. Perceptions about the curriculum

Summary of qualitative themes on students’ perceptions of the research curriculum.

| **Theme** | **Summary** |
| --- | --- |
| Positive aspects of the current research curriculum | - There is a wide range of professors with diverse expertise available for students to choose as research mentors. Faculty members are highly supportive and willing to guide students throughout their research journey. - Tonkla Ramathibodi offers strong support by providing a professor-matching platform on its website, making it easier for students to connect with suitable advisors. - Funding for student research projects is readily available through Tonkla Ramathibodi, which helps reduce financial barriers to conducting research. - Institution-hosted seminars create valuable opportunities for students to generate research ideas and find appropriate advisors. Many students express a preference for in-person seminars over online ones. - Some students find that participating in research projects clarifies how the concepts learned in class can be applied in real-world research settings. However, others report gaining more knowledge about research from external experiences than from the curriculum itself, with some outright stating that the research course is not particularly useful. - A student highlighted the benefits of the research club and journal club, hosted collaboratively by professors and students, as excellent resources for learning and engagement. - Another student also mentioned that the research course is structured in a way that, if followed diligently, enables medical students to learn, understand, participate in, and complete their research work successfully, which is a design that many consider a strong point of the curriculum. |
| Challenges with the current research curriculum | - The curriculum requires students to select an advisor by their second year (pre-clinical stage) and submit a research question by the third year, which many students feel is too early. At this stage, students often have not yet identified their clinical interests, or they may discover later during clinical years that they are more passionate about different topics. - Many students believe the advisor-to-student ratio is inadequate, leaving insufficient advisors available for all interested students or groups. - Some students expressed that lessons from research-related courses were not applicable to real-life research settings, although they could not provide specific examples to illustrate this disconnect. - The dual-campus system, requiring students to alternate between Ramathibodi Hospital and Chakri Naruebodindra Medical Institute, complicates the logistics of conducting research and meeting with advisors. - Research activities are typically scheduled for Wednesdays, creating a non-continuous workflow (one day per week). Given the already demanding nature of medical studies, students have limited time to dedicate to their research projects. - Another concern is resource dilution. Since every student is required to complete a research project, resources may be stretched thin, potentially reducing the support available for those genuinely passionate about research. This raises questions about whether the quality of student research output justifies the increased workload, effort, and financial investment required from faculty and the institution. - Clinical professors often do not participate in institution-hosted research seminars. As a result, students attending these seminars frequently encounter research topics unrelated to clinical practice, despite a significant interest among students in clinical research. - The funding available for student research through Tonkla Ramathibodi is sometimes insufficient to cover the costs of more complex or ambitious projects. Additionally, some students reported delays in the transfer of approved funding, which hindered the timely progress of their research. |
| Suggested improvements for the research curriculum | - Consider revising the mandatory research requirement for students. Either make research optional or postpone the advisor matching and research question submission to later in the program, such as during clinical years. This would allow students to explore their clinical interests before committing to a research topic. Making research non-mandatory would also enable advisors to work with students who are genuinely interested in research, rather than those participating out of obligation. Some interviewees suggest that curriculum planners reassess the true goals of the research curriculum and evaluate whether mandating research effectively achieves these objectives. - Increase faculty subscriptions to academic journals to provide students with access to papers that are currently behind paywalls. - Allocate dedicated time periods, such as weeks or months similar to elective rotations, solely for students to focus on their research projects. - Ensure that the research matching website is updated in real time, reflecting accurate contact information for advisors and the number of student slots each professor is willing to accommodate. - Enhance the current Tonkla Ramathibodi service by adopting a more proactive role in the advisor-student matching process. For instance, instead of relying on students to reach out via email, the service could actively contact students and help them find suitable advisors. This approach could support students who are less proactive while ensuring efficient matching. However, the feasibility and potential outcomes of this change would require further evaluation. |
| Opinion on the mandatory nature of research projects for medical students | - The majority of interviewees opposed making research projects mandatory, citing that not all medical students aspire to become researchers or professors. Many are solely focused on pursuing careers as hospitalists. - Some, however, expressed support for having research as a mandatory subject, as long as it does not require completing a full research project. |
| Would the participant still pursue research if it were not mandatory? | - Yes (n=6) - Maybe (n=7) - No (n=6) |
